# Supplementary material
Source: HighWire-hosted journal article supplement (doi:10.1101/rna.041657.113)
Supplement: SuppFigLegends.docx [file SuppFigLegends.docx]

**Supplementary Figures**

**Figure S1. Results from next generation sequencing of *D.virilis* small RNA libraries. A**. Size distribution of reads from *D.virilis* small RNA sequencing libraries (embryo 0-2h to adult) mapping to the genome. The majority of reads from each sample are of ~30 nt length, and map to the small ribosomal 2S RNA. Apart from these, libraries are enriched in reads of sizes 22-23 nucleotides, corresponding to the microRNA fraction. **B.** Composition of long (25+ nt) and short (19-24 nt) read fractions of the deep sequencing libraries. Labels are as in the main text.

**Figure S2. Novel microRNAs in *D.virilis.***Genomic coordinates, numbers of reads mapping to 5’ and 3’ (5p and 3p) arms, and genomic context of the candidate novel microRNAs in *D. virilis* are shown on the left; precursor hairpin structure is shown on the right, with 5p and 3p arms in red and purple. Hairpin images are generated with mirdeep2 (Friedländer et al. 2008).

**Figure S3. Average expression levels of mature microRNAs of different evolutionary rates across *D.virilis* development.** From left to right, graphs show the average expression levels of mature microRNA sequences with 3-9, 1-2 or 0 substitutions normalized against the total number of reads mapping to the genome per million.

**Figure S4. Expression patterns of microRNAs of different evolutionary rates throughout the development of *D. melanogaster*.** Data is retrieved from the GEO database (see Supplementary Table 3). Stages are labelled as follows: 0-1h embryo (e0), 2-6h embryo (e2), etc., 6-10h embryo (e6), 12-24h embryos (e12), larvae and adults. **A.** Relative expression levels of microRNAs with low, medium and high evolutionary rates for the whole hairpin at each stage of development. **B.** Relative expression levels of mature microRNAs with low, medium and high evolutionary rates at each stage of development. **C**. Correlation of microRNA evolutionary rates at the level of the whole hairpin and the mature sequences and microRNA expression levels throughout development. Vertical axes represent Spearman’s correlation coefficient (rho) obtained for each stage; values are statistically significant (p<0.05). **D.** Expression levels of microRNAs of mature microRNAs with high (3-9) number of substitutions. Heatmap reflects the expression levels of each fast evolving microRNA throughout development. MicroRNAs are sorted by their total expression level in all libraries shown on the right, and microRNAs with negligible total expression levels of below 1000 RPM are not shown.

**Figure S5. Transcriptome age index (TAI, top) and transcriptome divergence index (TDI, bottom) for microRNAs throughout *D.melanogaster* and *D.virilis* development.** Stages are labelled as follows: 0-2h embryo (e0), 2-4h embryo (e2), etc., 16-30h embryo (e16), larvae and adults in *D. virilis*, and 0-1h (e0), 2-6h (e2), 6-10h (e6), 12-24h (e12), larvae and adults in *D. melanogaster*. Vertical axes represent TAI and TDI, as determined by the method described in (Domazet-Loso et al. 2010; Quint et al. 2012). Dashed lines indicate ± the standard deviation of TAI and TDI determined by bootstrapping.

**Figure S6. Sequence conservation of the mir-309~6 cluster and its upstream region in *D.melanogaster* and *D.virilis*.** A region encompassing mir-309~6 primary transcript and enhancer region (Biemar et al. 2005) up to the neighboring gene is aligned to the homologous region in *D.virilis*. Histogram indicates the regions of high sequence similarity (size window 20bp, minimum conserved width 20bp), with regions with similarity >70% in color. Evident are highly conserved regions upstream the primary transcript, including conserved TAGteam binding sites in both species. Graph generated in Vista browser (Mayor et al. 2000).

**References**

Biemar F, Zinzen R, Ronshaugen M, Sementchenko V, Manak JR, Levine MS. 2005. Spatial regulation of microRNA gene expression in the Drosophila embryo. *Proc Natl Acad Sci U S A* **102**: 15907–11.

Domazet-Loso T, Tautz D, Domazet-Lošo T. 2010. A phylogenetically based transcriptome age index mirrors ontogenetic divergence patterns. *Nature* **468**: 815–8.

Friedländer MR, Chen W, Adamidi C, Maaskola J, Einspanier R, Knespel S, Rajewsky N. 2008. Discovering microRNAs from deep sequencing data using miRDeep. *Nat Biotechnol* **26**: 407–15.

Mayor C, Brudno M, Schwartz JR, Poliakov A, Rubin EM, Frazer K a, Pachter LS, Dubchak I. 2000. VISTA : visualizing global DNA sequence alignments of arbitrary length. *Bioinformatics* **16**: 1046–7.

Quint M, Drost H-G, Gabel A, Ullrich KK, Bönn M, Grosse I. 2012. A transcriptomic hourglass in plant embryogenesis. *Nature* **490**: 98–101.
