# Supplementary material
Source: HighWire-hosted journal article supplement (doi:10.1101/rna.041657.113)
Supplement: Table_S1.docx [file Table_S1.docx]

**Table S1: List of animal genomes used in the study.**

| **Taxon** | **Species** | **Source** | **Release** |
| --- | --- | --- | --- |
| *Sophophora* | *Drosophila melanogaster* | Flybase | r5.40 |
| *Sophophora* | *Drosophila sechellia* | Flybase | r1.3 |
| *Sophophora* | *Drosophila simulans* | Flybase | r1.3 |
| *Sophophora* | *Drosophila yakuba* | Flybase | r1.3 |
| *Sophophora* | *Drosophila erecta* | Flybase | r1.3 |
| *Sophophora* | *Drosophila ananssae* | Flybase | r1.3 |
| *Sophophora* | *Drosophila willistoni* | Flybase | r1.3 |
| *Sophophora* | *Drosophila pseudoobscura* | Flybase | r2.23 |
| *Sophophora* | *Drosophila persimilis* | Flybase | r1.3 |
| *Drosophila* | *Drosophila mojavensis* | Flybase | r1.3 |
| *Drosophila* | *Drosophila virilis* | Flybase | r1.2 |
| *Drosophila* | *Drosophila grimshawi* | Flybase | r1.3 |
| *Nematocerca* | *Aaedes aegypti* | Vectorbase | Liverpool strain genomic supercontig sequences, AaegL1 |
| *Nematocerca* | *Anopheles gambiae* | Vectorbase | PEST strain chromosome arm sequences, AgamP3 |
| *Lepidoptera* | *Bombix mori* | SilkDB | scaffolds v2.0 |
| *Coleoptera* | *Tribolium castaneum* | NCBI genomes | Tcas_3.0 |
| *Hymenoptera* | *Apis mellifera* | NCBI genomes | Amel_4.5 chromosome |
| *Hymenoptera* | *Nasonia vitripennis* | NCBI genomes | Nvit_1.0 |
| *Hemiptera* | *Acyrthosiphon pisum* | NCBI genomes | Acyr_2.0 |
| *Crustacea* | *Daphnia pulex* | JGI | v1.0 |
| *Myriapoda* | *Strigamia maritima* | NCBI genomes | Smar_1.0 |
| *Chelicerata* | *Ixodes scapularis* | Vectorbase | Wikel strain genomic supercontig sequences, IscaW1 |
| *Nematoda* | *Caenorhabditis elegans* | UCSD | ce10 |
| *Lophotrohozoa* | *Capitella teleta* | JGI | v1.0 |
| *Chemichordata* | *Branchiostoma floridae* | JGI | v1.0 |
| *Chordata* | *Mus musculus* | Ensembl | NCBIM37 |
