# Supplementary material
Source: HighWire-hosted journal article supplement (doi:10.1101/rna.041657.113)
Supplement: Table_S2.xlsx [file Table_S2.xlsx]

## Sheet: Sheet1
Table S3. D.virilis microRNA expression. Numbers of reads mapping to predicted homologs of known microRNAs and novel microRNAs in D.virilis. For microRNAs listed on miRBase, name and accession number is displayed; ‘homolog’ and microRNA family name stand for newly discovered homologs, and ‘novel’ for D.virilis-specific microRNA candidates. Coordinates are for D.virilis genome version dvir_r1.2_FB…
name	miRBase accession*	scaffold	start	end	strand	e0	e2	e4	e6	e8	e10	e12	e14	e16	larva	adult
bantam	MI0009533	scaffold_13049	5805321	5805401	+	5774	3700	3875	7280	10333	16563	17568	17914	87446	10793	31695
let-7	MI0009548	scaffold_12963	18451352	18451429	+	0	0	0	0	0	0	0	1	11	8	911
dvi-mir-1	MI0009527	scaffold_12963	13613429	13613515	-	52	39	76	330	422	896	1166	1149	4010	2395	2633
dvi-mir-10	MI0009528	scaffold_13047	6092064	6092140	+	2123	1775	15776	26804	32882	40577	40890	39241	111679	26574	22406
dvi-mir-100	MI0009541	scaffold_12963	18449845	18449926	+	0	0	0	1	1	0	1	0	2	1	249
mir-1000	homolog	scaffold_12855	6810264	6810359	-	8	1	0	7	29	189	336	396	1028	38	46
mir-1002	homolog	scaffold_12723	5043907	5043964	-	1	1	8	237	445	773	674	551	674	0	0
mir-1003	homolog	scaffold_13047	780929	781019	+	23	14	26	29	23	58	122	138	224	55	30
mir-1006	homolog	scaffold_12963	6536539	6536602	-	0	0	1	0	3	2	1	3	10	11	0
mir-1007	homolog	scaffold_12970	7925740	7925811	-	0	0	0	0	0	0	0	0	2	1	0
mir-1010	homolog	scaffold_13047	8363196	8363269	-	15	17	11	70	85	114	132	117	396	72	102
mir-1011	homolog	scaffold_13047	12031346	12031408	+	0	0	0	0	0	0	0	0	0	0	0
mir-1017	homolog	scaffold_13047	3684420	3684491	+	0	0	0	0	0	0	0	0	3	1	5
dvi-mir-11	MI0009483	scaffold_13047	6338951	6339031	+	4431	3260	9428	21379	33111	52388	46595	46795	72836	22103	22686
dvi-mir-12	MI0009479	scaffold_12970	2049328	2049401	+	51	51	37	155	259	710	844	865	3162	487	1350
dvi-mir-124	MI0009505	scaffold_12963	16493163	16493260	+	70	49	157	6090	10490	12782	11036	10863	12852	603	183
dvi-mir-125	MI0009484	scaffold_12963	18451658	18451767	+	0	0	0	0	0	0	0	2	2	5	388
dvi-mir-133	MI0009502	scaffold_12963	13475791	13475877	-	26	13	0	0	0	1	2	2	498	28	581
mir-137	homolog	scaffold_10468	1969	2054	-	5	3	0	0	0	0	1	0	74	4	20
dvi-mir-13a	MI0009480	scaffold_13047	13335637	13335710	+	67.6667	38	65	109.667	151.667	262	347.333	312	210	136.5	141.667
dvi-mir-13b-1	MI0009504	scaffold_13047	13335793	13335860	+	67.6667	38	71	118.667	157.667	278.5	358.333	330	770	137	151.667
dvi-mir-13b-2	MI0009521	scaffold_12970	9304338	9304410	+	68.6667	38	67	111.667	154.667	265.5	353.333	314	767	137	141.667
dvi-mir-14	MI0009539	scaffold_10324	225328	225390	+	840	637	640	588	738	915	1029	1019	5234	2494	6216
dvi-mir-184	MI0009516	scaffold_12875	243293	243390	+	7455	4550	7959	17175	25891	40371	31779	28700	76529	25825	52344
mir-190	homolog	scaffold_13049	6215367	6215457	+	53	49	52	79	83	173	365	556	1502	122	160
mir-193	homolog	scaffold_13049	17910654	17910759	+	0	0	0	0	0	0	0	0	0	2	132
dvi-mir-210	MI0009494	scaffold_12928	1257219	1257302	-	0	0	0	0	0	0	0	0	1	5	463
dvi-mir-219	MI0009546	scaffold_13049	5991431	5991527	-	0	0	0	0	0	0	0	0	3	0	3
mir-2495	homolog	scaffold_12963	10059317	10059398	-	0	0	0	0	0	0	0	0	0	0	0
mir-252	homolog	scaffold_12855	2861520	2861603	+	27	27	0	9	40	169	222	234	1074	304	718
dvi-mir-263a	MI0009486	scaffold_12963	13235111	13235199	+	1326	1114	199	2174	4789	13498	18774	20663	56148	25604	40651
dvi-mir-263b	MI0009488	scaffold_13049	24412528	24412598	-	3	1	0	1	6	37	38	46	127	0	52
dvi-mir-274	MI0009487	scaffold_13049	23860717	23860821	+	0	0	0	0	0	2	0	0	1	0	203
dvi-mir-275	MI0009538	scaffold_12963	15419968	15420059	-	115	69	80	98	124	192	122	113	125	438	277
dvi-mir-276a	MI0009509	scaffold_13049	16143986	16144074	+	107	90	7	35	89	919	1556	1866	10282	5226.5	9500
dvi-mir-276b	MI0009508	scaffold_13049	16093217	16093313	+	10	2	1	1	2	7	46	69	524	486.5	1242
dvi-mir-277	MI0009513	scaffold_12855	2684222	2684310	-	4	2	3	3	2	9	11	7	129	129	1156
dvi-mir-278	MI0009503	scaffold_12875	6427546	6427636	-	13	14	7	7	13	4	37	44	325	689	900
dvi-mir-279	MI0009482	scaffold_12822	2330926	2331019	+	522	294	333	357	454	564	542	551	1463	436	656
dvi-mir-280	MI0009532	scaffold_12875	9206208	9206287	+	0	0	0	0	0	0	0	0	0	0	0
dvi-mir-281-1	MI0009514	scaffold_12875	19829928	19830015	+	10.5	4.5	1.5	2.5	3.5	3	10	4.5	128	125.5	174.5
dvi-mir-281-2	MI0009493	scaffold_12875	19830112	19830202	+	127.5	104.5	11.5	9.5	17.5	31	48	74.5	2359	2727.5	3412.5
dvi-mir-282	MI0009498	scaffold_12758	910711	910804	-	33	18	14	19	18	15	16	12	13	725	24
dvi-mir-283	MI0009501	scaffold_12970	2047663	2047757	+	23	18	28	129	213	481	525	552	1348	147	113
dvi-mir-284	MI0009545	scaffold_12855	584480	584577	+	0	2	0	0	0	0	0	0	8	30	21
dvi-mir-285	MI0009536	scaffold_13049	21101441	21101540	+	0	1	2	0	3	0	4	2	9	2	162
dvi-mir-286*	MI0009517	scaffold_12875	4112127	4112227	+	1684	11611	433039	457928	502272	452436	227147	184817	193012	796	28
dvi-mir-287	MI0009496	scaffold_12963	16502565	16502632	+	0	0	0	0	0	0	0	0	0	0	0
dvi-mir-288	MI0009519	scaffold_12963	13472851	13472947	+	0	0	0	0	0	0	0	0	0	0	0
mir-289	homolog	scaffold_13049	19817999	19818070	-	0	0	0	0	0	0	0	0	0	0	0
dvi-mir-2a-1	MI0009477	scaffold_12723	2960783	2960859	-	97.75	52.9167	76.25	141.833	248.833	523.083	667.5	709.833	980	176.25	208.583
dvi-mir-2a-2	MI0009476	scaffold_12723	2960516	2960587	-	97.75	52.9167	75.25	142.833	247.833	533.583	664.5	724.833	990	182.75	217.583
dvi-mir-2b	MI0009518	scaffold_12723	2961099	2961181	-	97.0833	51.4167	83.0833	154	253.667	531.917	625.333	688.667	2923	175.583	184.917
dvi-mir-2c	MI0009478	scaffold_13047	13335417	13335514	+	90.4167	48.75	62.4167	108.333	174.667	414.417	547.667	603.667	71	165.917	337.917
dvi-mir-3	MI0009525	scaffold_12875	4111962	4112026	+	1	32	1226	907	648	217	109	77	44	0	0
dvi-mir-304	MI0009544	scaffold_12970	2048753	2048841	+	1	0	3	16	26	26	22	38	52	22	24
dvi-mir-305	MI0009506	scaffold_12963	15419842	15419914	-	1294	754	925	716	761	539	376	311	594	3493	2496
dvi-mir-306	MI0009481	scaffold_12963	12863214	12863292	-	71	38	162	194	205	163	150	96	217	93	54
dvi-mir-307	MI0009520	scaffold_12875	5789456	5789543	-	0	0	0	0	0	0	2	1	5	4	14
dvi-mir-308	MI0009535	scaffold_12875	17605307	17605368	+	3	0	2	5	5	10	12	5	24	10	14
dvi-mir-309	MI0009526	scaffold_12875	4111809	4111882	+	2	77	2159	1060	662	199	116	74	69	2	0
dvi-mir-310	MI0009500	scaffold_12875	13668747	13668822	-	8907.5	5499.5	6607	5304.5	4889.5	2603	1288	764.5	1293	27	829
mir-310~313	homolog	scaffold_12875	13668884	13668990	-	10395.5	6290.5	7512	5994.5	5552.5	3148	1643	1002.5	1480	33	1006
dvi-mir-313	MI0009485	scaffold_12875	13669117	13669187	-	198	100	138	168	159	157	118	61	71	2	33
dvi-mir-314	MI0009475	scaffold_13049	23988161	23988251	+	2	1	0	0	0	0	0	0	21	49	18
dvi-mir-315a	MI0009510	scaffold_13049	18083590	18083671	-	44	33	1	17	71	1235	2177	2403	6618	553	117
dvi-mir-316	MI0009512	scaffold_13049	24266839	24266926	+	4	1	0	1	1	5	27	28	169	38	39
dvi-mir-317	MI0009515	scaffold_12855	2698541	2698626	-	15	5	12	17	11	20	21	17	45	165	420
dvi-mir-318	MI0009489	scaffold_13047	1194332	1194400	+	1	0	0	0	0	0	0	1	0	3	1330
dvi-mir-31a	MI0009534	scaffold_12875	16937665	16937756	-	533	464	11	16	43	2465.5	10586.5	13059.5	47504	13126	9343.5
dvi-mir-31b	MI0009540	scaffold_12726	2775754	2775879	-	24	16	0	0	3	41.5	101.5	136.5	516	477	747.5
dvi-mir-33	MI0009507	scaffold_13049	22941119	22941210	-	185	92	102	107	91	113	116	129	476	1004	1683
dvi-mir-34	MI0009523	scaffold_12855	2682554	2682640	-	8	9	6	7	10	13	22	15	67	253	1145
mir-375	homolog	scaffold_12963	19405401	19405492	+	4	6	0	3	25	110	150	123	536	1272	575
dvi-mir-4	MI0009524	scaffold_12875	4112313	4112393	+	3	49	1014	746	717	519	300	201	344	1	0
mir-4941	homolog	scaffold_13049	9209865	9209966	+	0	0	0	0	0	0	0	0	0	0	0
mir-4952	homolog	scaffold_12822	645555	645680	-	0	0	0	0	0	0	0	0	0	0	0
mir-4956	homolog	scaffold_12928	60678	60783	-	0	0	0	0	0	0	0	0	0	0	0
mir-4959	homolog	scaffold_12726	998469	998577	-	0	0	0	0	0	0	0	0	0	0	0
mir-4970	homolog	scaffold_12963	14649053	14649102	-	0	0	0	0	0	0	0	0	0	0	0
mir-4976	homolog	scaffold_12875	15675073	15675152	-	0	0	0	0	0	0	0	0	0	0	0
mir-4979	homolog	scaffold_12823	519100	519205	+	0	0	0	0	0	0	0	0	0	0	0
mir-4987	homolog	scaffold_12963	15772767	15772897	+	0	0	0	0	0	0	0	0	0	0	0
dvi-mir-5	MI0009529	scaffold_12875	4112468	4112537	+	77	394	9759	9911	10241	9433	6044	4993	7792	75	2
dvi-mir-6-1	MI0009537	scaffold_12875	4112632	4112701	+	47.3333	694	6068.08	3042.92	3482.83	3960.17	2968.58	2627.83	3854	17	0
dvi-mir-6-2	MI0009490	scaffold_12875	4112784	4112863	+	27.3333	100	2382.08	2858.92	3300.83	3827.17	2881.58	2553.83	3738	12	0
dvi-mir-6-3	MI0009511	scaffold_12875	4112960	4113032	+	46.3333	1403	9891.08	3127.42	3569.83	4052.67	3012.58	2665.83	4250	24	1
dvi-mir-7	MI0009497	scaffold_12823	2295179	2295264	-	221	142	1022	3105	4238	5254	2794	2066	2154	247	564
dvi-mir-79	MI0009543	scaffold_12963	12863042	12863133	-	2	1	8	15	12.5	7.5	13.5	7	7	9.5	2.5
dvi-mir-8	MI0009522	scaffold_12875	10672395	10672485	-	804	707	261	1639	3009	7325	9953	10733	40067	26566	32842
dvi-mir-87	MI0009542	scaffold_12723	3996253	3996344	+	1	0	0	0	0	0	10	8	85	1	11
mir-927	homolog	scaffold_12970	3343546	3343609	-	29	20	5	1	8	2	4	5	581	52	678
mir-929	homolog	scaffold_12822	1418817	1418898	+	0	1	0	0	0	1	0	0	13	2	13
dvi-mir-92a	MI0009547	scaffold_12855	6880792	6880872	+	1276	753.5	1220	1402	1635	1170.5	617.5	431	413	239.5	203.5
dvi-mir-92b	MI0009530	scaffold_12855	6883810	6883900	+	11973	7138.5	14889	19864	23016	15464.5	6552.5	4343	4869	2160.5	1873.5
mir-932	homolog	scaffold_12963	14767755	14767818	-	1	2	2	0	1	1	0	0	35	4	16
mir-955	homolog	scaffold_12758	855589	855658	-	0	0	0	0	0	0	0	0	19	0	0
mir-956*	homolog	scaffold_13049	23989471	23989516	-	500	411	10	19	29	40	77	38	12293	28157	313316
mir-957	homolog	scaffold_13049	17242419	17242510	+	43	34	16	13	26	21	15	20	236	73	1573
mir-958	homolog	scaffold_13049	17089433	17089512	+	109	67	75	410	538	902	993	1035	4572	1717	1186
mir-962	homolog	scaffold_12963	3615436	3615522	+	0	0	0	0	0	1	3	1	0	16	178
mir-963	homolog	scaffold_12963	3616359	3616429	+	0	0	0	0	0	0	0	0	0	1	5
mir-964	homolog	scaffold_12963	3616492	3616562	+	0	0	0	0	0	0	2	1	2	10	160
mir-965	homolog	scaffold_12963	8856419	8856499	+	9	9	355	377	350	349	294	208	362	74	99
mir-968	homolog	scaffold_12723	5044055	5044117	-	0	0	2	67	108	174	224	209	274	1	0
mir-969	homolog	scaffold_12928	1264104	1264186	-	0	1	0	0	0	0	0	0	6	0	4
mir-970	homolog	scaffold_13042	2658869	2658947	+	22	21	22	33	36	67	72	84	211	134	172
mir-971	homolog	scaffold_12928	4279784	4279851	-	0	0	0	0	0	1	0	0	9	0	1
mir-973	homolog	scaffold_13042	918353	918427	-	1	0	0	1	0	2	0	0	1	1	47
mir-974	homolog	scaffold_13042	917557	917651	-	0	0	0	0	0	0	0	0	0	0	5
mir-974	homolog	scaffold_13042	917735	917829	-	0	0	0	0	0	0	0	0	0	0	6
mir-975	homolog	scaffold_13042	906914	907008	-	0	0	0	0	0	1	0	1	0	3	45
mir-976	homolog	scaffold_13042	906739	906821	-	0	0	0	0	0	0	1	1	0	1	30
mir-977	homolog	scaffold_13042	906576	906670	-	0	0	0	1	0	0	0	1	12	0	7
mir-980	homolog	scaffold_10277	1030	1115	-	0	0	0	1	2	7	7	2	117	4	0
mir-981	homolog	scaffold_12942	51501	51591	+	2	2	1	2	0	9	15	24	0	11	71
mir-986	homolog	scaffold_12875	9403406	9403501	+	1	4	0	11	27	16	22	12	51	31	22
mir-987	homolog	scaffold_12875	1241669	1241760	-	1	5	0	1	0	1	1	1	121	17	182
mir-988	homolog	scaffold_12875	19840382	19840459	+	24	19	67	83	93	149	119	135	0	28	26
mir-989	homolog	scaffold_12875	1889410	1889446	+	0	0	0	0	0	0	0	0	250	0	520
mir-993	homolog	scaffold_13047	6141853	6141960	-	4	6	0	0	5	13	44	62	9	27	131
mir-994	homolog	scaffold_13047	1194177	1194267	+	1	0	1.75	1.75	1.5	2	1.25	1.5	3195	0	698
mir-995	homolog	scaffold_13047	12148474	12148556	-	3555	2035	3166	4107	5703	6672	6892	4891	245	1988	1169
mir-996	homolog	scaffold_12822	2333415	2333510	+	150	77	124	163	190	169	205	168	619	171	364
mir-998	homolog	scaffold_13047	6339605	6339736	+	90	41	315	665	788	913	652	498	8162	200	175
mir-999	homolog	scaffold_12822	3936756	3936840	-	1702	1038	1391	2035	2398	2893	2433	2119	8208	959	3625
dvi-mir-9a	MI0009495	scaffold_13049	13137024	13137098	+	45	78	1068	2641	3487.5	5602.5	5107.5	4943	311	3033.5	457.5
dvi-mir-9b	MI0009492	scaffold_12963	12862861	12862949	-	201	125	253	326	405	444	320	264	819	214	131
dvi-mir-9c	MI0009491	scaffold_12963	12863849	12863937	-	957	526	863	1275	1502	1476	901	700	31	379	374
dvi-mir-iab-4	MI0009531	scaffold_12855	414706	414773	-	0	0	23	33	42	66	63	55	31	15	5
mir-iab-8	homolog	scaffold_12855	414706	414773	+	1	0	0	0	0	2	6	5	44	2	2
candidate1	novel	scaffold_12855	6282625	6282718	+	0	1	1	2	5	3	14	5	4	49	336
candidate2	novel	scaffold_12855	6284648	6284774	+	0	0	0	0	0	1	1	1	4	7	7
candidate3	novel	scaffold_12855	6284791	6284883	+	0	0	0	0	1	0	1	2	40	8	70
candidate4	novel	scaffold_12970	9418994	9419089	-	0	0	0	0	0	0	0	0	2	2	10
candidate5	novel	scaffold_12970	9427846	9427976	-	0	0	0	0	0	0	0	0	3	0	8
candidate6	novel	scaffold_12970	9428974	9429102	-	0	0	0	2	0	0	0	0	0	5	6
candidate7	novel	scaffold_12970	9429441	9429543	-	0	0	0	0	0	1	0	0	0	3	13
candidate8	novel	scaffold_12970	9428386	9428489	+	5.5	3	2	3	9	11	8.5	9.5	0	56	140.5
candidate9	novel	scaffold_13042	917881	917955	-	0	0	0	0	1	0	2	0	13	2	73
candidate10	novel	scaffold_13042	4534963	4535061	+	4	2	2	3	3	5	3	5	6	8	25
candidate11	novel	scaffold_13047	10963007	10963114	+	0	0	1	3	2	3	1	1	0	0	6
candidate12	novel	scaffold_13049	24646575	24646666	-	4	2	5	1	2	0	2	0	0	0	4
candidate13	novel	scaffold_13049	3076866	3077003	+	0	0	1	1	0	0	1	0	2	1	6
*where there is no miRBase accession number, the name of the most closely related D.melanogaster homolog is provided
