# Supplementary material
Source: HighWire-hosted journal article supplement (doi:10.1101/rna.041657.113)
Supplement: Table_S3.docx [file Table_S3.docx]

**Table S2: GEO accessions of *D. melanogaster* small RNA libraries.**

| **GEO** | **Description** | **Reference** |
| --- | --- | --- |
| GSM180330 | very early embryo (0-1h) | [ Ruby JG et al.] |
| GSM180331 | early embryo (2-6h) | [ Ruby JG et al.] |
| GSM180332 | mid embryo (6-10h) | [ Ruby JG et al.] |
| GSM180333 | late embryo (12-24h) | [ Ruby JG et al.] |
| GSM180334 | larvae: 1st instar and 3rd instars | [ Ruby JG et al.] |
| GSM180329 | adult bodies (female bodies, male bodies) | [ Ruby JG et al.] |
